# PSYCHIATRYonline

Your Destination for Lifelong Learning in Psychiatry

The one-stop resource for information on diagnosis, treatment, guidelines, the latest research, and breaking news from the field.

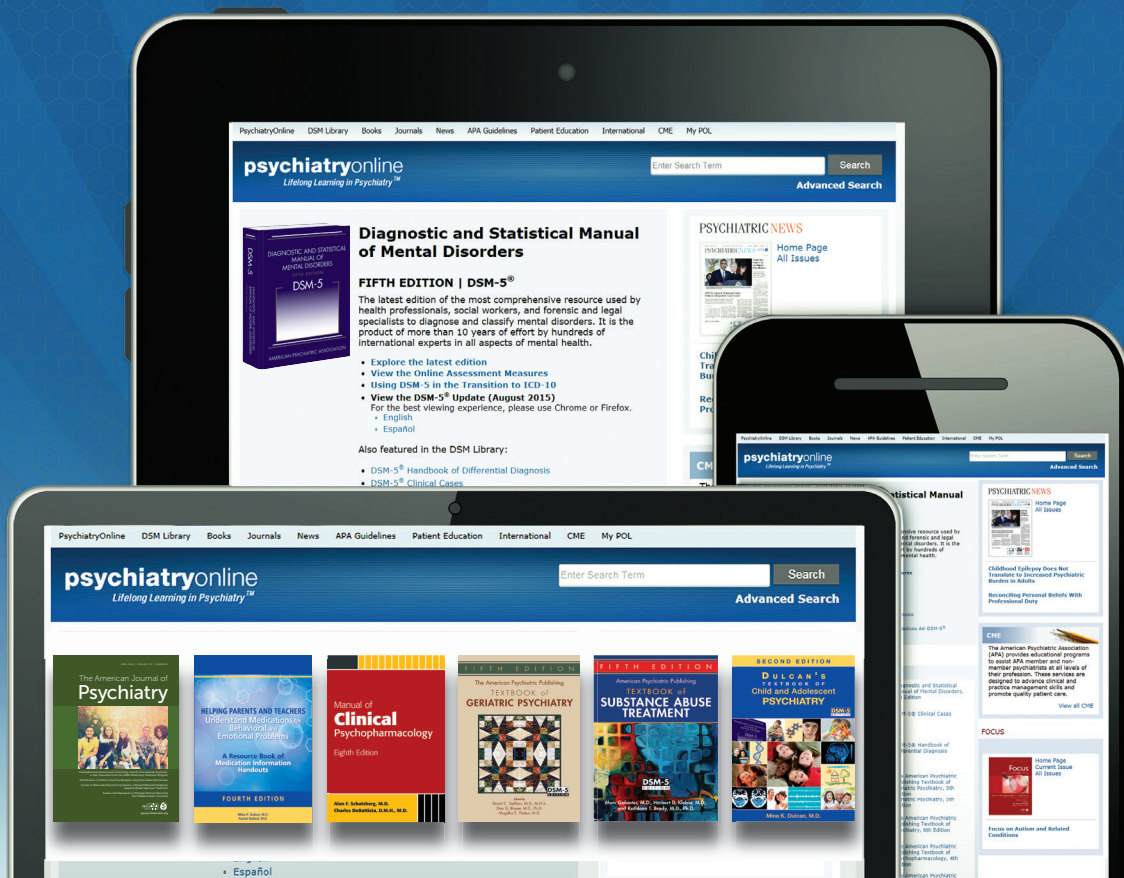

Subscribe to products individually or to the DSM Select package that includes the DSM-5<sup>®</sup> library, books and select journals.

**Go to [www.appi.org](http://www.appi.org) to subscribe.**

*Institutional subscription options are available. For more information contact: [institutions@psych.org](mailto:institutions@psych.org); 800-368-5777 ext. 3720*

AMERICAN  
PSYCHIATRIC  
ASSOCIATION  
PUBLISHING  
[www.appi.org](http://www.appi.org)

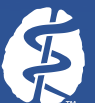

# Titles to Help Mental Health Professionals

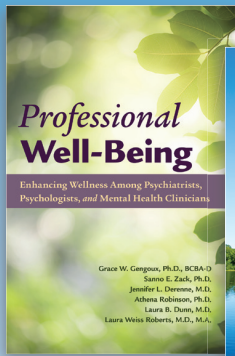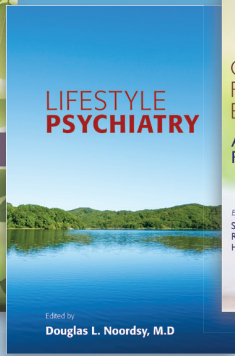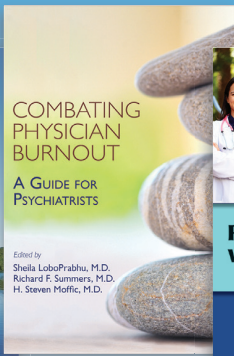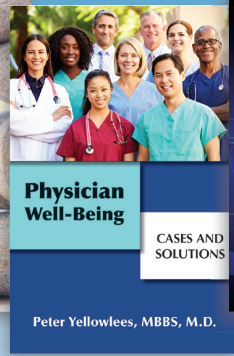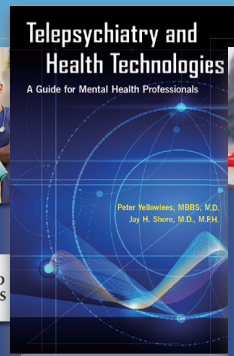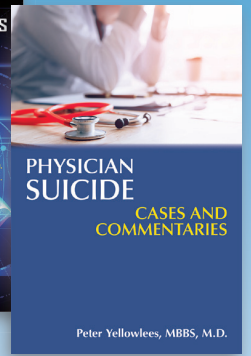

## Professional Well-Being

Enhancing Wellness Among Psychiatrists, Psychologists, and Mental Health Clinicians

Grace Gengoux, Ph.D., BCBA-D,  
Sanno E. Zack, Ph.D.,  
Jennifer L. Derenne, M.D.,  
Athena Robinson, Ph.D.,  
Laura B. Dunn, M.D., and  
Laura Weiss Roberts, M.D., M.A.

Physician self-care is correlated with patient care; a growing body of evidence supports this. Yet, a culture persists within medicine that values overwork, perfectionism, and self-sacrifice, often to the detriment of clinicians themselves. This book advocates for a new culture—one that is supportive of the health and well-being of health professionals to the benefit of the patients and populations they serve.

2020 • 298 pages • ISBN 978-1-61537-229-4  
Paperback • \$55.00 • Item #37229

2020 • 298 pages • ISBN 978-1-61537-308-6  
eBook • \$44.00 • Item #37308

## Lifestyle Psychiatry

Edited by Douglas L. Noordsy, M.D.

The book discusses the impact of the provider's lifestyle on clinical behavior and the implications of lifestyle medicine and psychiatry for health care systems and population health, offering a broader examination of the important role this new field can play in leading a sophisticated, holistic approach to optimizing wellness.

2019 • 416 pages • ISBN 978-1-61537-166-2  
Paperback • \$59.00 • Item #37166

2019 • 416 pages • ISBN 978-1-61537-252-2  
eBook • \$47.00 • Item #37252

## Combating Physician Burnout

A Guide for Psychiatrists

Edited by Sheila LoboPrabhu, M.D.,  
Richard F. Summers, M.D., and  
H. Steven Mofric, M.D.

This book aims to educate psychiatrists about three key concepts: stress, burnout, and physician impairment. The introduction discusses the history and social context of burnout. Subsequent sections discuss the potential effects of burnout on clinical care, contextual elements that may contribute to burnout, potential systemic and individual interventions, and the moral challenge burnout poses to psychiatry.

2020 • 344 pages • ISBN 978-1-61537-227-0  
Paperback • \$60.00 • Item #37227

2020 • 344 pages • ISBN 978-1-61537-272-0  
eBook • \$48.00 • Item #37272

## Physician Well-Being

Cases and Solutions

Peter Yellowlees, MBBS, M.D.

This book focuses its gaze on the range of the provider experience, from pre-med programs to specific scenarios such as medical marriages. Through fictional case studies, it proposes solutions designed to make today's typical health care environments more effective.

2020 • 265 pages • ISBN 978-1-61537-240-9  
Paperback • \$55.00 • Item #37240

2020 • 265 pages • ISBN 978-1-61537-290-4  
eBook • \$44.00 • Item #37290

## Telepsychiatry and Health Technologies

A Guide for Mental Health Professionals

Peter Yellowlees, MBBS, M.D., and  
Jay H. Shore, M.D., M.P.H.

This a practical guide for mental health professionals seeking innovative digital technologies to improve the quality of care for patients with psychiatric disorders. Beginning with an overview of current psychiatric practice, the authors cover the broader context of telepsychiatry, give specific guidance on setting up and managing a telepsychiatry practice; and discuss in-person, online, and hybrid models of care, as well as data collection, electronic records, clinical documentation, and ethics.

2018 • 403 pages • ISBN 978-1-61537-085-6  
Paperback • \$69.00 • Item #37085

2018 • 403 pages • ISBN 978-1-61537-160-0  
eBook • \$55.00 • Item #37160

## Physician Suicide

Cases and Commentaries

Peter Yellowlees, MBBS, M.D.

The book examines how the related disorders of burnout, anxiety, depression, and addiction, can lead to suicide and explores the influence of gender, culture, aging, and personal resilience on outcomes. In addition, it investigates ways to mitigate the impact of these factors to improve physician health and well-being and thereby reduce the number of physicians who kill themselves.

2019 • 251 pages • ISBN 978-1-61537-169-3  
Paperback • \$52.00 • Item #37169

2019 • 251 pages • ISBN 978-1-61537-213-3  
eBook • \$41.95 • Item #37213

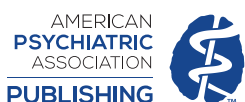

 **20% Discount for American Psychiatric Association Members**  
**25% Discount for APA Resident-Fellow Members**

 **ORDER @ [www.appi.org](http://www.appi.org) | Email: [appi@psych.org](mailto:appi@psych.org) | Toll Free: 1-800-368-5777**

# FACTS AND MYTHS DECODED

To learn more, visit [www.TEAM-ADHD.com/awareness](http://www.TEAM-ADHD.com/awareness), or scan here.

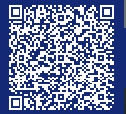

**MYTH:** ADHD IS A SIMPLE SCHOOL-DAY DISORDER

**FACT:** UP TO 75% OF CHILDREN AND ADOLESCENTS HAVE AT LEAST 1 OVERLAPPING COMORBIDITY<sup>1</sup>

In pediatric patients with ADHD, the following conditions are commonly reported<sup>2,3</sup>:

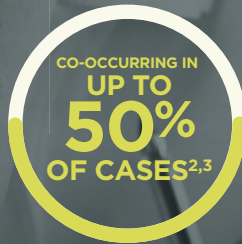

- Depression
- Anxiety disorders
- Oppositional defiant disorder
- Pervasive developmental disorders/autism spectrum disorder

**You can help. Dive deeper into complex ADHD.**

As a trusted resource for your patients and their caregivers, please encourage them to visit **MoreToADHD.com**. Here, they can learn more about the treatment complexities often associated with ADHD.

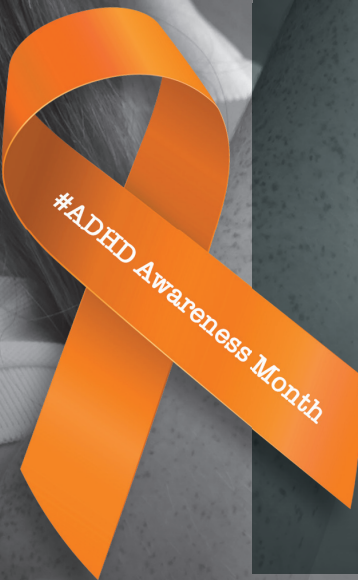

Actor Portrayal.

**REFERENCES:** 1. Banaschewski T, Becker K, Dopfner M, Holtmann M, Rosler M, Romanos M. Attention deficit/hyperactivity disorder. *Dtsch Arztebl Int.* 2017;114(9):149-159. 2. Ciernow DB, Bushe C, Mancini M, Ossipov MH, Upadhyaya H. A review of the efficacy of atomoxetine in the treatment of attention-deficit hyperactivity disorder in children and adult patients with common comorbidities. *Neuropsychiatr Dis Treat.* 2017;13:357-371. 3. Turgay A, Ansari R. Major depression with ADHD in children and adults. *Psychiatry (Edmont).* 2006;3(4):2-32.

**TEAM  
ADHD**  
TREATING, EDUCATING AND MANAGING ADHD
