# The American Journal of Psychiatry

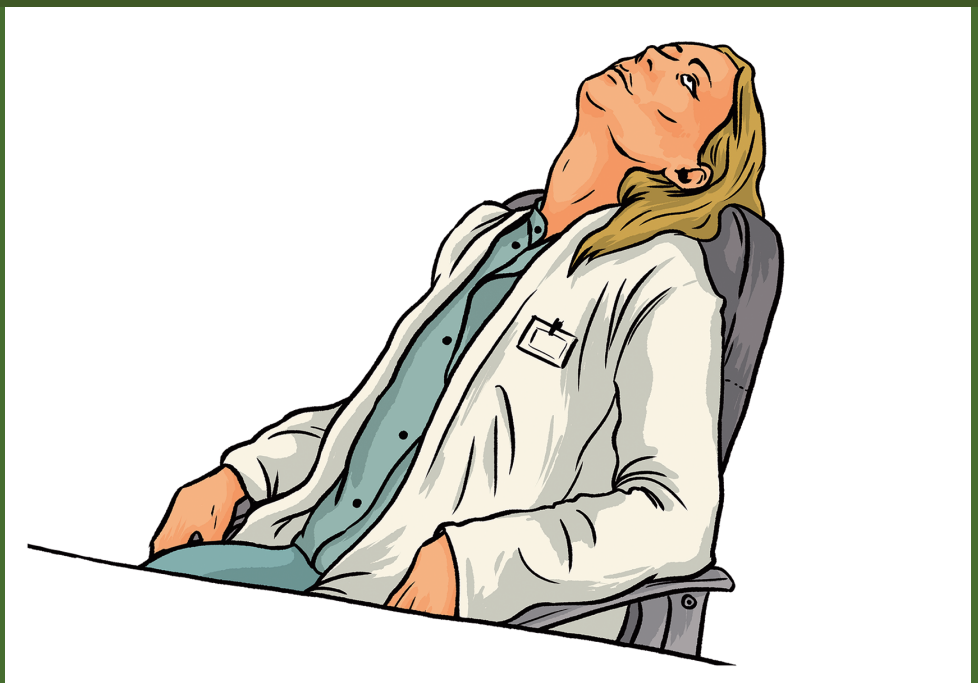

Well-Being, Burnout, and Depression Among North American Psychiatrists: The State of Our Profession

Genome-Wide Association Study of Suicide Death and Polygenic Prediction of Clinical Antecedents

Polygenic Risk and Progression to Bipolar or Psychotic Disorders Among Individuals Diagnosed With Unipolar Depression in Early Life

An Exposure-Wide and Mendelian Randomization Approach to Identifying Modifiable Factors for the Prevention of Depression
